# Supplementary material for: Utilizing FBR to produce olefins from CO reduction using Fe–Mn nanoparticles on reduced graphene oxide catalysts and comparing the performance with SBR
Source: Royal Society of Chemistry journal article supplement (doi:10.1039/c8ra09003c), 2018-01-01
Supplement: c8ra09003c1.pdf [file c8ra09003c1.pdf]

**Supporting Information**  
**Utilizing FBR to produce olefins from CO reduction using Fe-Mn  
nanoparticles on reduced graphene oxide catalysts and comparing the  
performance with SBR**

AL-Hassan Nasser <sup>1,2\*</sup>, Hamada ELnaggar <sup>1</sup>, Ahmed AbdelMoneim <sup>1\*</sup>

<sup>1</sup> Materials Science and Engineering Department, Egypt-Japan University of Science and Technology, New Borg El-Arab, Alexandria 21934, Egypt

<sup>2</sup> Chemical Engineering Department, Faculty of Engineering, Alexandria University, Alexandria 11432, Egypt

\* Corresponding authors: [codecsbzero@gmail.com](mailto:codecsbzero@gmail.com); [ahmed.abdelmoneim@ejust.edu.eg](mailto:ahmed.abdelmoneim@ejust.edu.eg)

## 1. FBR results

**Table S 1: The effect of Mn loading and Temperature on the FBR FTS performance**

|                            | Fe                        | FeMn1 | FeMn2 | Fe         | FeMn1 | FeMn2 | Fe         | FeMn1 | FeMn2 |
|----------------------------|---------------------------|-------|-------|------------|-------|-------|------------|-------|-------|
|                            |                           | 6     | 9     |            | 6     | 9     |            | 6     | 9     |
| <b>T (°C)</b>              | <b>300</b>                |       |       | <b>320</b> |       |       | <b>340</b> |       |       |
| <b>CO conv %</b>           | 43                        | 60    | 33    | 70         | 93    | 72    | 82         | 98    | 91    |
| <b>Fraction</b>            | <b>Selectivity C mol%</b> |       |       |            |       |       |            |       |       |
| <b>CO<sub>2</sub></b>      | 14                        | 25    | 16    | 29         | 37    | 23    | 38         | 41    | 36    |
| <b>CH<sub>4</sub></b>      | 31                        | 11    | 10    | 39         | 8.3   | 12    | 40         | 17    | 24    |
| <b>C 2-4 olefin</b>        | 12                        | 23    | 20    | 6.4        | 20    | 28    | 2.6        | 22    | 40    |
| <b>C 5-9 olefin</b>        | 5.8                       | 20    | 25    | 2.7        | 25    | 28    | 1.1        | 14    | 14    |
| <b>Total olefin</b>        | 18                        | 47    | 55    | 10         | 49    | 63    | 3.8        | 40    | 54    |
| <b>C9+ HC</b>              | 1.7                       | 16    | 17    | 0.9        | 21    | 5.21  | 0.2        | 18    | 0.32  |
|                            |                           |       |       | 1          |       |       | 9          |       |       |
| <b>Total Paraffin</b>      | 71                        | 33    | 35    | 86         | 26    | 32    | 92         | 39    | 46    |
| <b>Total iso</b>           | 11                        | 19    | 11    | 4.0        | 25    | 5.8   | 3.8        | 20    | 2.5   |
| <b>Total par + iso</b>     | 82                        | 52    | 45    | 90         | 51    | 37    | 96         | 60    | 47    |
| <b>O/P</b>                 | 0.2                       | 0.90  | 1.22  | 0.1        | 0.96  | 1.7   | 0.0        | 0.67  | 1.1   |
|                            | 2                         |       |       | 1          |       |       | 4          |       |       |
| <b>Olefin yield</b>        | 6.6                       | 21    | 15    | 4.6        | 29    | 35    | 1.9        | 23    | 31    |
| <b><math>\alpha</math></b> | 0.5                       | 0.71  | 0.75  | 0.5        | 0.77  | 0.66  | 0.4        | 0.71  | 0.48  |
|                            | 5                         |       |       | 1          |       |       | 2          |       |       |

**Reaction conditions: H<sub>2</sub>/CO = 1, 4.2 l/gh, 2MPa**

**Table S 2: Effect of space velocity on the FBR FTS performance**

|                                                               | <b>FeMn16</b>             |            |            |
|---------------------------------------------------------------|---------------------------|------------|------------|
| <b>GHSV (l/gh)</b>                                            | <b>4.2</b>                | <b>6.2</b> | <b>8.2</b> |
| <b>CO conversion %</b>                                        | 92                        | 93         | 94         |
| <b>Fraction</b>                                               | <b>Selectivity C mol%</b> |            |            |
| <b>CO<sub>2</sub></b>                                         | 37                        | 37         | 44         |
| <b>CH<sub>4</sub></b>                                         | 8.3                       | 17         | 23         |
| <b>C 2-4 olefin</b>                                           | 20                        | 27         | 30         |
| <b>C 5-9 olefin</b>                                           | 25                        | 15         | 14         |
| <b>Total olefin</b>                                           | 49                        | 45         | 46         |
| <b>C9+ HC</b>                                                 | 21                        | 19         | 7.4        |
| <b>Total Paraffin</b>                                         | 26                        | 39         | 45         |
| <b>Total iso</b>                                              | 25                        | 16         | 8.9        |
| <b>Total par + iso</b>                                        | 51                        | 55         | 54         |
| <b>O/P</b>                                                    | 0.96                      | 0.82       | 0.84       |
| <b>Olefin yield</b>                                           | 29                        | 26         | 24         |
| <b><math>\alpha</math></b>                                    | 0.77                      | 0.61       | 0.58       |
| <b>Reaction conditions: H<sub>2</sub>/CO = 1, 320°C, 2MPa</b> |                           |            |            |

**Table S 3: Effect of pressure on the FBR FTS performance**

| <b>FeMn16</b>                                                     |                           |          |
|-------------------------------------------------------------------|---------------------------|----------|
| <b>P (MPa)</b>                                                    | <b>1</b>                  | <b>2</b> |
| <b>CO conversion %</b>                                            | 84                        | 93       |
| <b>Fraction</b>                                                   | <b>Selectivity C mol%</b> |          |
| <b>CO<sub>2</sub></b>                                             | 35                        | 37       |
| <b>CH<sub>4</sub></b>                                             | 18                        | 8.3      |
| <b>C 2-4 olefin</b>                                               | 30                        | 20       |
| <b>C 5-9 olefin</b>                                               | 19                        | 25       |
| <b>Total olefin</b>                                               | 52                        | 49       |
| <b>C9+ HC</b>                                                     | 8.58                      | 21       |
| <b>Total Paraffin</b>                                             | 40                        | 26       |
| <b>Total iso</b>                                                  | 11                        | 25       |
| <b>Total par + iso</b>                                            | 50                        | 51       |
| <b>O/P</b>                                                        | 1.0                       | 0.96     |
| <b>-Olefin yield</b>                                              | 28                        | 29       |
| <b><math>\alpha</math></b>                                        | 0.63                      | 0.77     |
| <b>Reaction conditions: H<sub>2</sub>/CO=1, 320 °C, 4.2 L/g.h</b> |                           |          |

## 2. Calculation scheme

The equations used to calculate the catalyst performance are summarized as follows:

For the inlet conditions the molar rate is calculated by using the Gas Law:

$$F_{0t} = \frac{\dot{V} \times P_r \times 100 \times 60}{10^6 \times 8.314 \times (T_r + 273)} \frac{\text{mol}}{\text{h}}$$

At any time during the reaction the molar rate is measured by the same law but using the instantaneous flow rate as measured from the bubble flow meter:

$$F_{0 \text{ or } F} = \frac{P_r \times 100 \times 10 \times 3600}{t_{0 \text{ or } t} \times 10^6 \times 8.314 \times (T_r + 273)} \frac{\text{mol}}{\text{h}}$$

Where  $P_r$  and  $T_r$  are the room temperature and pressure,  $\dot{V}$  is the volumetric flow rate of the feed, and  $t$  is the time in s/10ml gas (bubble flow meter reading).

The product molar rates for any gas species  $i$  are calculated as follows utilizing the GC-TCD data:

$$F_i = \frac{F \times EAT_i \times x_i}{SAT_i} \frac{\text{C mol}}{\text{h}} \quad i = \text{CH}_4, \text{CO or CO}_2, \text{TCD Area}$$

$EAT_i$  is the TCD area for component ( $i$ ) in the exit stream

$SAT_i$  is the TCD area for component ( $i$ ) in the standard gas

The TCD data is used to calculate the CO conversion from the following equation if Ar is used as an internal standard

$$f_{\text{CO}} \% = 1 - \frac{EAT_{\text{CO}} / EAT_{\text{Ar}}}{FAT_{\text{CO}} / FAT_{\text{Ar}}} \times 100$$

If an external standard is used like CO or CH<sub>4</sub> then the conversion can be calculated as follows

$$f_{CO\%} = 1 - \frac{F_{CO}}{y_{0\ CO} F_0} \times 100$$

From the gas FID data we can compute the light hydrocarbon mole rates as follows

$$FG_{N,(o/p/i/t)} = \frac{F \times AG_{N,(o/p/i/t)} \times x_{CH_4}}{SAF_{CH_4}} \frac{C\ mol}{h}$$

$FG_{N,(o/p/i/t)}$  is the mole rate of the component N in the exit gas stream

$AG_{N,(o/p/i/t)}$  is the FID peak area for component N in the gas product, it can be calculated for olefins, paraffins, iso-paraffins or for the total hydrocarbon fraction, hence the subscript (o/p/i/t).

$SAF_{CH_4}$  is the FID peak area for methane in the standard gas

$x_{CH_4}$  is the methane mol fraction in the standard gas

And from the liquid FID data the heavy hydrocarbons' molar rate is produced from the following equation

$$FL_{N,(o/p/i/t)} = \frac{AL_{N,(o/p/i/t)} \times W_{12} \times N_{12}}{A_{C12} \times M_{12} \times TOS} \frac{C\ mol}{h}$$

$FL_{N,(o/p/i/t)}$  is the mole rate of the component N in the liquid product.

$AL_{N,(o/p/i/t)}$  is the FID peak area for component N in the liquid product, it can be calculated for olefins, paraffins, iso-paraffins or for the total hydrocarbon fraction, hence the subscript (o/p/i/t).

$W_{12}$ : is the mass of the n-dodecane external standard used for the FID area calibration.

$N_{12}$  is the number of carbon atoms in n-dodecane

$A_{C12}$  is the FID peak area for the C12 fraction, since the amount of n-dodecane is very big compared to the C-12 fraction products in the liquid products, therefore the area can be assumed to represent n-dodecane only.

$M_{12}$ : is the Molecular weight of n-dodecane

TOS: is the total Time On Stream

Then we can calculate the total molar rate in Cmol or mol/h of each carbon number as follows

$$F_{N,t} \text{ Cmol} = FG_{N,t} + FL_{N,t} \frac{\text{Cmol}}{h}$$

$$F_{N,t} = \frac{FG_{N,t} + FL_{N,t}}{N_N} \frac{\text{mol}}{h}$$

$N_N$ : is the number of carbon atoms in an alkane of chain length N

The selectivities for the hydrocarbon fractions can be computed from the following equations:

$$S \text{ Cmol}_{N,(o/p/i/t)} \% = \frac{FG_{N,(o/p/i/t)} + FL_{N,(o/p/i/t)}}{\sum_N F_{N,t}} \frac{\text{Cmol HC}}{\text{Cmol CO reacted}}$$

$$S \text{ mol}_{N,(o/p/i/t)} \% = \frac{FG_{N,(o/p/i/t)} + FL_{N,(o/p/i/t)}}{\sum_N F_{N,t} \times N_N} \frac{\text{mol HC}}{\text{mol THC}}$$

If the selectivity are summed up across the carbon numbers by family (paraffins or olefins or isoparaffins), then the total family selectivity can be obtained:

$$S \text{ Cmol}_{(o/p/t)} \% = \sum_N S \text{ Cmol}_{N,(o/p/t)} \%$$

When the total olefin selectivity is divided by the total paraffin and iso paraffins selectivity we get the olefin to paraffin ratio as follows:

$$O/P = \frac{S Cmol_o \%}{S Cmol_p \% + S Cmol_i \%}$$

The total carbon balance of the system must be  $\leq 100\%$  and is calculated as follows:

$$CB\% = \frac{\sum_N F_{N,t} Cmol + F_{CO_2}}{F_0 \times y_{CO} \times f_{CO}\%} \times 100$$

The hydrocarbons' molar rate is then used to calculate the mass rates according to the following equation:

$$W_N = F_{N,t} \times M_N \quad \frac{g}{h}$$

From the mass rates the ASF probability factor  $\alpha$  can be calculated from the gradient of the plot between  $\log(W_N/N)$  and  $(N-1)$  by using single variable regression.
